# Supplementary material
Source: MDPI journal article supplement (https://www.mdpi.com/2071-1050/13/24/13806)
Supplement: s1 [file s1]

# Biomass valorization to bioenergy: Assessment of biomass residues availability and bioenergy potential in Nigeria

Uchechukwu Stella Ezealigo <sup>1,\*</sup>, Blessing Nonye Ezealigo <sup>2</sup>, Francis Kemausuor <sup>3</sup>, Luke Ekem Kweku Achenie <sup>4</sup>, and Azikiwe Peter Onwualu <sup>1</sup>

<sup>1</sup> Department of Materials Science and Engineering, African University of Science and Technology, Abuja, P.M.B. 681, Nigeria; aonwualu@aust.edu.ng

<sup>2</sup> Department of Physics and Astronomy, University of Nigeria, Nsukka, 410001, Nigeria; blessing.ezealigo@gmail.com

<sup>3</sup> Department of Agricultural and Biosystems Engineering, Kwame Nkrumah University of Science and Technology, Kumasi, Ak 4448-6434, Ghana; kemausuor@gmail.com

<sup>4</sup> Department of Chemical Engineering, Virginia Polytechnic Institute and State University, Blacksburg, VA 24061, USA; luke.achenie@gmail.com

\* Correspondence: uezealigo@aust.edu.ng

Table S1- S6

**Table S1: Annual wood production**

| Year | Round wood<br>total<br>(m <sup>3</sup> ) x 10 <sup>6</sup> | Wood fuel<br>(m <sup>3</sup> ) x 10 <sup>6</sup> | wood<br>charcoal (m <sup>3</sup> )<br>x 10 <sup>6</sup> |
|------|------------------------------------------------------------|--------------------------------------------------|---------------------------------------------------------|
| 2008 | 71.8                                                       | 62.4                                             | 3.76                                                    |
| 2009 | 72.2                                                       | 62.8                                             | 3.85                                                    |
| 2010 | 72.6                                                       | 62.8                                             | 3.94                                                    |
| 2011 | 73.0                                                       | 63.6                                             | 4.02                                                    |
| 2012 | 73.4                                                       | 64.0                                             | 4.11                                                    |
| 2013 | 73.8                                                       | 64.4                                             | 4.19                                                    |
| 2014 | 74.9                                                       | 64.8                                             | 4.28                                                    |
| 2015 | 75.3                                                       | 65.3                                             | 4.37                                                    |
| 2016 | 75.6                                                       | 65.6                                             | 4.44                                                    |
| 2017 | 75.9                                                       | 65.9                                             | 4.52                                                    |
| 2018 | 76.2                                                       | 66.2                                             | 4.60                                                    |

Source: FAOSTAT [18]

**Table S2: Annual industrial round wood production**

| Year                                  | 2008  | 2009  | 2010  | 2011  | 2012  | 2013  | 2014   | 2015   | 2016   | 2017   | 2018   |
|---------------------------------------|-------|-------|-------|-------|-------|-------|--------|--------|--------|--------|--------|
| Quantity in million (m <sup>3</sup> ) | 9.418 | 9.418 | 9.418 | 9.418 | 9.418 | 9.418 | 10.022 | 10.022 | 10.022 | 10.022 | 10.022 |

**Table S3: Forestry Residue**

| Year      | NO-PRETREATMENT    |       |                                         |       | WITH PRE-TREATMENT |       |                                         |       |
|-----------|--------------------|-------|-----------------------------------------|-------|--------------------|-------|-----------------------------------------|-------|
|           | Cellulosic ethanol |       | Biogas (industrial scale)               |       | Cellulosic ethanol |       | Biogas (industrial scale)               |       |
|           | ML/yr              | Mtoe  | [Mm <sup>3</sup> CH <sub>4</sub> /year] | Mtoe  | ML/yr              | Mtoe  | [Mm <sup>3</sup> CH <sub>4</sub> /year] | Mtoe  |
| 2008-2013 | 75.05              | 0.041 | 67.51                                   | 0.058 | 318                | 0.174 | 67.51                                   | 0.058 |
| 2014-2018 | 78.96              | 0.043 | 71.03                                   | 0.061 | 335                | 0.232 | 71.03                                   | 0.061 |

**Table S4: Annual livestock production**

| <b>Animals</b> | <b>Population (Heads) x10<sup>6</sup></b> |             |             |             |             |             |             |             |             |             |             |
|----------------|-------------------------------------------|-------------|-------------|-------------|-------------|-------------|-------------|-------------|-------------|-------------|-------------|
|                | <b>2008</b>                               | <b>2009</b> | <b>2010</b> | <b>2011</b> | <b>2012</b> | <b>2013</b> | <b>2014</b> | <b>2015</b> | <b>2016</b> | <b>2017</b> | <b>2018</b> |
| Cattle         | 16.30                                     | 16.40       | 16.60       | 19.00       | 19.20       | 19.40       | 19.80       | 20.20       | 20.60       | 21.00       | 21.40       |
| Chicken        | 174.0                                     | 183.0       | 192.0       | 149.00      | 159.00      | 135.0       | 137.0       | 143.00      | 147.0       | 143.0       | 139.0       |
| Goats          | 53.80                                     | 55.10       | 56.50       | 67.30       | 69.00       | 70.70       | 72.00       | 72.50       | 73.80       | 78.00       | 79.30       |
| Pigs           | 6.910                                     | 7.180       | 7.470       | 6.280       | 6.530       | 6.800       | 6.990       | 7.370       | 7.480       | 7.500       | 7.500       |
| Sheep          | 33.90                                     | 34.70       | 35.50       | 38.40       | 39.30       | 40.30       | 41.30       | 41.60       | 42.10       | 42.50       | 43.00       |
| TOTAL          | 274.0                                     | 285.0       | 297.0       | 308.0       | 280.0       | 293.0       | 272.0       | 277.0       | 285.0       | 291.0       | 292.0       |

Source: FAOSTAT [20]

**Table S5: Municipal solid waste generated and bioenergy potential**

| <b>Year</b> | <b>Population<br/>10<sup>7</sup></b> | <b>Waste/day<br/>10<sup>7</sup></b> | <b>Waste/yr<br/>10<sup>9</sup></b> | <b>Organic<br/>fraction<br/>10<sup>11</sup></b> | <b>TS in Organic<br/>wasted generated<br/>10<sup>11</sup></b> | <b>CH<sub>4</sub><br/>potential<br/>Mm<sup>3</sup></b> | <b>Mtoe</b> |
|-------------|--------------------------------------|-------------------------------------|------------------------------------|-------------------------------------------------|---------------------------------------------------------------|--------------------------------------------------------|-------------|
| 2008        | 2.55                                 | 1.51                                | 5.52                               | 3.25                                            | 1.41                                                          | 56545.56                                               | 48.82       |
| 2009        | 2.63                                 | 1.56                                | 5.69                               | 3.35                                            | 1.46                                                          | 58320.71                                               | 50.35       |
| 2010        | 2.72                                 | 1.61                                | 5.88                               | 3.46                                            | 1.50                                                          | 60159.28                                               | 51.94       |
| 2011        | 2.80                                 | 1.66                                | 6.06                               | 3.57                                            | 1.55                                                          | 62064.37                                               | 53.58       |
| 2012        | 2.89                                 | 1.71                                | 6.26                               | 3.68                                            | 1.60                                                          | 64044.29                                               | 55.29       |
| 2013        | 2.98                                 | 1.77                                | 6.46                               | 3.80                                            | 1.65                                                          | 66084.90                                               | 57.05       |
| 2014        | 3.08                                 | 1.83                                | 6.67                               | 3.92                                            | 1.70                                                          | 68197.63                                               | 58.88       |
| 2015        | 3.18                                 | 1.89                                | 6.89                               | 4.05                                            | 1.76                                                          | 70388.54                                               | 60.77       |
| 2016        | 3.28                                 | 1.95                                | 7.11                               | 4.18                                            | 1.82                                                          | 72657.90                                               | 62.73       |
| 2017        | 3.39                                 | 2.01                                | 7.34                               | 4.31                                            | 1.88                                                          | 75011.05                                               | 64.76       |
| 2018        | 3.50                                 | 2.08                                | 7.59                               | 4.45                                            | 1.94                                                          | 77455.19                                               | 66.87       |

**Table S6: Municipal liquid waste generated and bioenergy potential**

| Year | Population<br>$10^7$ | MLW generated/day<br>(g) $10^9$ | MLW generated/yr<br>(ton) $10^6$ | TS Organic waste<br>generated $10^5$ | CH <sub>4</sub> potential<br>Mm <sup>3</sup> | Mtoe  |
|------|----------------------|---------------------------------|----------------------------------|--------------------------------------|----------------------------------------------|-------|
| 2008 | 2.55                 | 6.38                            | 2.33                             | 2.08                                 | 70.92                                        | 0.061 |
| 2009 | 2.63                 | 6.58                            | 2.40                             | 2.14                                 | 73.16                                        | 0.063 |
| 2010 | 2.72                 | 6.79                            | 2.48                             | 2.21                                 | 75.48                                        | 0.065 |
| 2011 | 2.80                 | 7.00                            | 2.56                             | 2.28                                 | 77.88                                        | 0.067 |
| 2012 | 2.89                 | 7.23                            | 2.64                             | 2.36                                 | 80.38                                        | 0.069 |
| 2013 | 2.98                 | 7.46                            | 2.72                             | 2.43                                 | 82.96                                        | 0.072 |
| 2014 | 3.08                 | 7.70                            | 2.81                             | 2.51                                 | 85.64                                        | 0.074 |
| 2015 | 3.18                 | 7.95                            | 2.90                             | 2.59                                 | 88.41                                        | 0.076 |
| 2016 | 3.28                 | 8.21                            | 3.00                             | 2.68                                 | 91.29                                        | 0.079 |
| 2017 | 3.39                 | 8.48                            | 3.09                             | 2.76                                 | 94.28                                        | 0.081 |
| 2018 | 3.50                 | 8.76                            | 3.20                             | 2.85                                 | 97.39                                        | 0.084 |
